# Supplementary figures and images for: Altered brain perfusion and oxygen levels relate to sleepiness and attention in post‐COVID syndrome
Source: PubMed Central journal article supplement — Ann Clin Transl Neurol. 2024 Jun 14;11(8):2016–29. doi: 10.1002/acn3.52121 (PMC11330224; doi:10.1002/acn3.52121), 2024-06-14

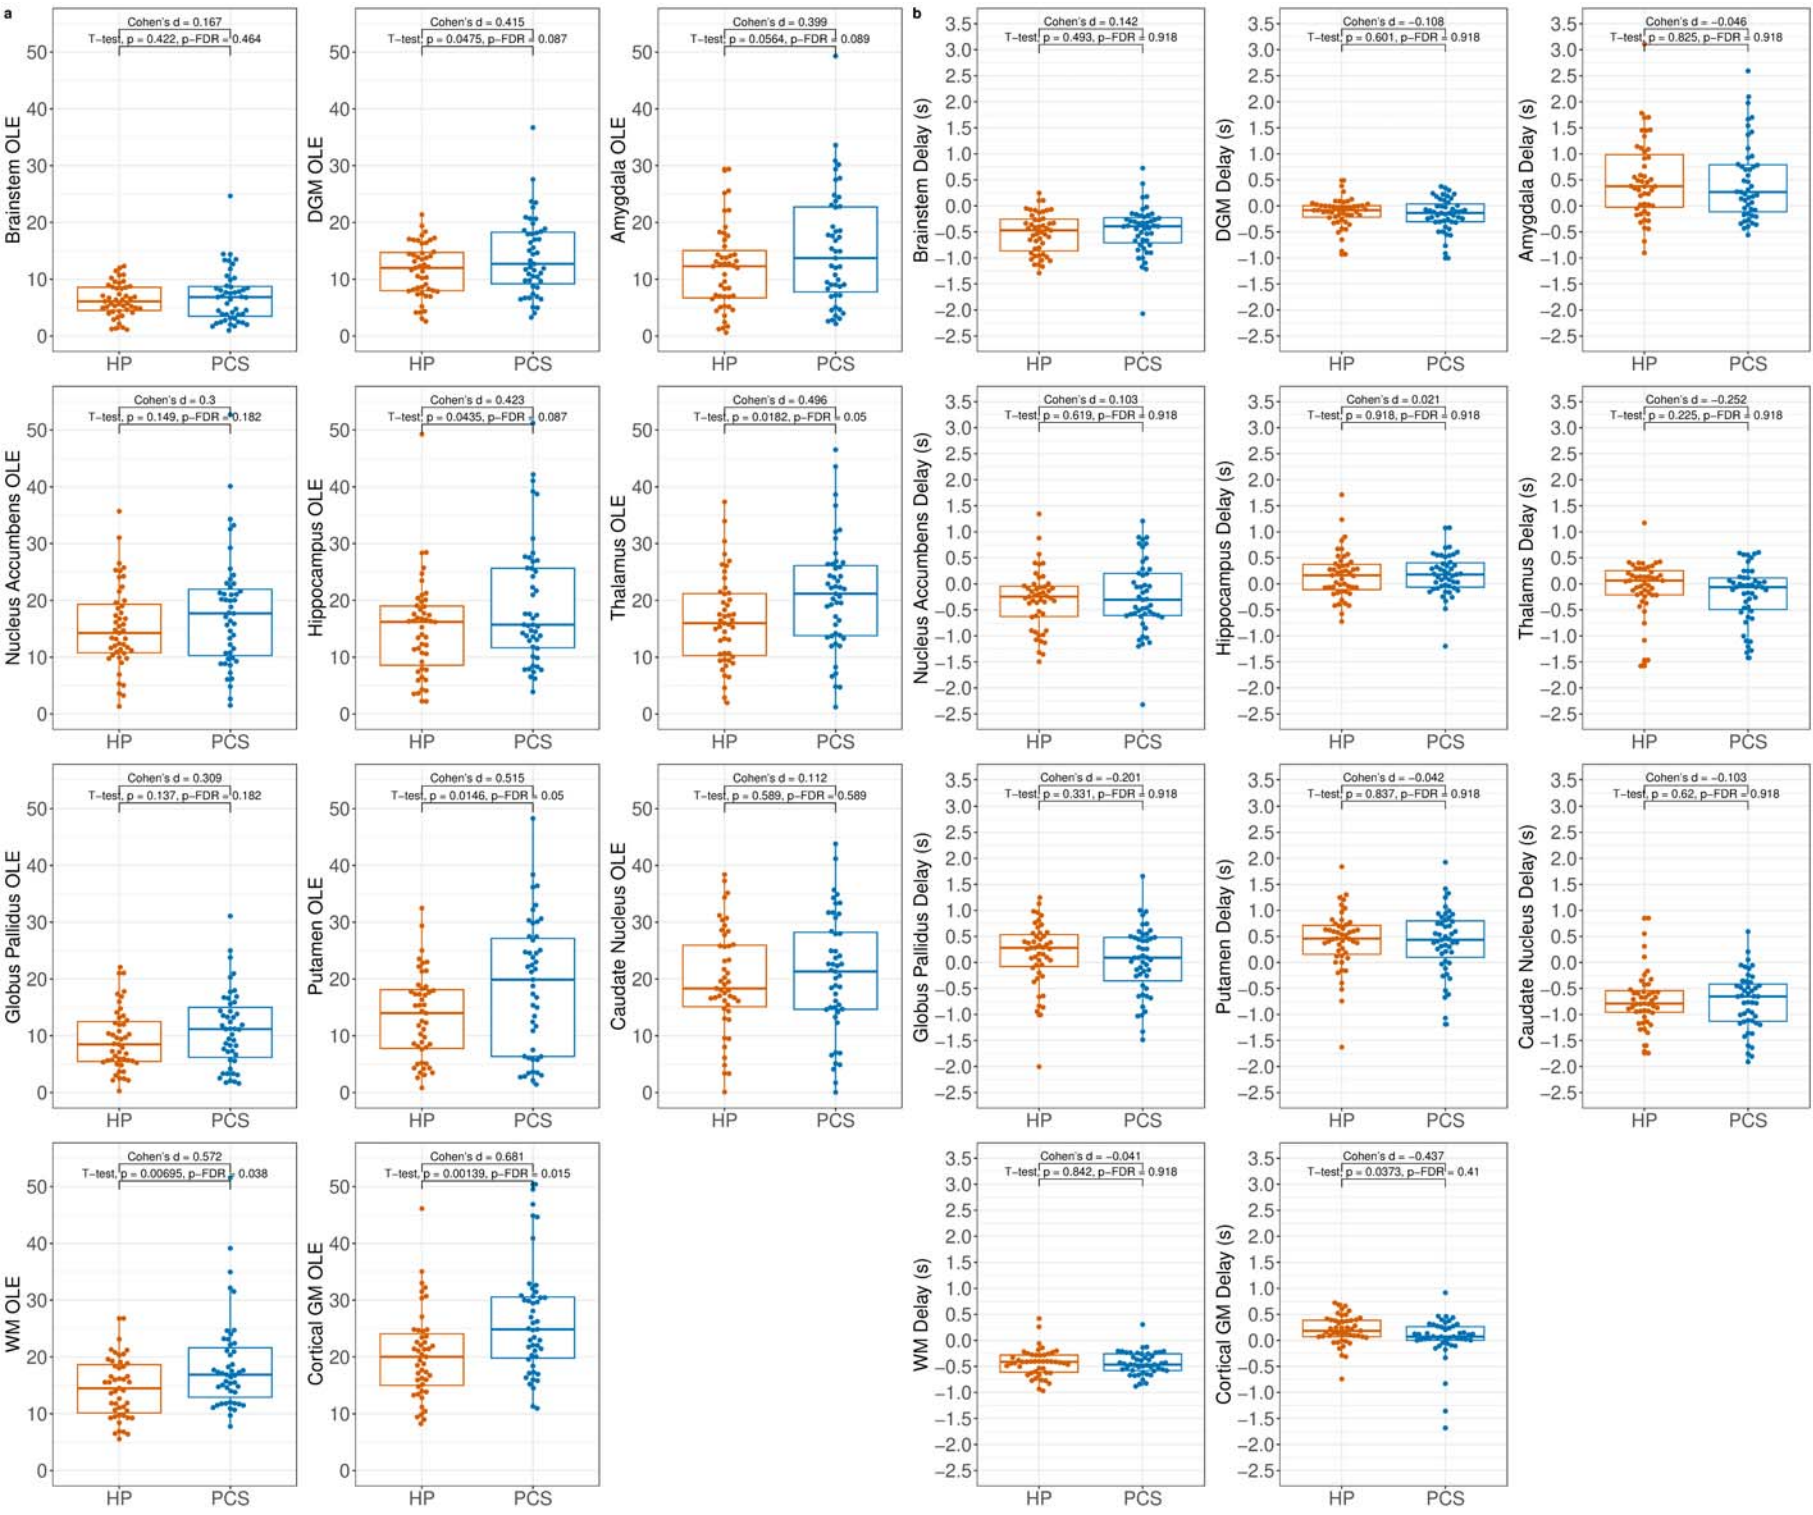

Supplement: ACN3-11-2016-s001.pdf [file ACN3-11-2016-s001.pdf]
